# Supplementary material
Source: Springer Nature journal article supplement (https://www.springermedizin.de/resource/supplementary/12958_2014_1248_MOESM1_ESM.pdf/9567144)

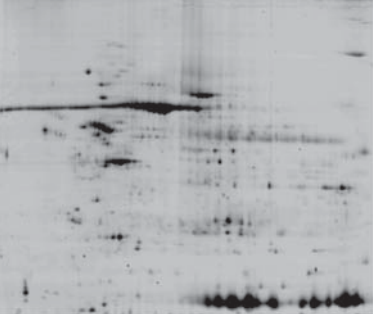

Lean control

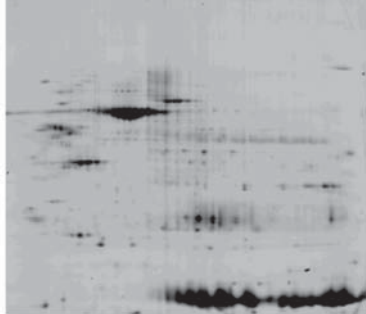

Lean recurrent miscarriage

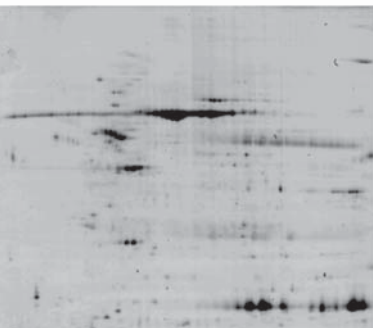

Obese control

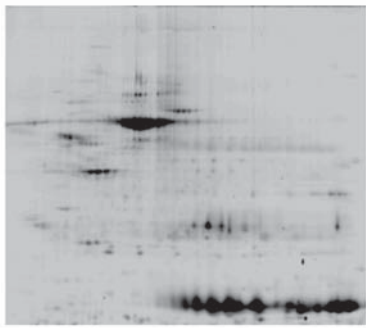

Obese recurrent miscarriage

Supplement: MOESM1 [file 9567144]
